# Supplementary material for: Association of Cardiovascular Health Score With Early‐ and Later‐Onset Diabetes and With Subsequent Vascular Complications of Diabetes
Source: PubMed Central journal article supplement — J Am Heart Assoc. 2022 Dec 24;12(1):e027558. doi: 10.1161/JAHA.122.027558 (PMC9973601; doi:10.1161/jaha.122.027558), 2022-12-24
Supplement: JAH3-12-e027558-s001.pdf [file JAH3-12-e027558-s001.pdf]

## **SUPPLEMENTAL MATERIAL**

**Table S1. Definitions of three classification for Cardiovascular Health Score**

| <b>Individual components of Cardiovascular Health Score</b> | <b>Poor<br/>(0 points)</b>   | <b>Intermediate<br/>(1 point)</b>                                    | <b>Ideal<br/>(2 points)</b>              |
|-------------------------------------------------------------|------------------------------|----------------------------------------------------------------------|------------------------------------------|
| Smoking                                                     | Current smoker               | Former smoker, quit ≤12 months                                       | Never smoker or quit >12 months          |
| Physical activity *                                         | <100                         | 100–299                                                              | ≥300                                     |
| Diet quality (APDQS) †                                      | Tertile 1 (median: 50)       | Tertile 2 (median:61)                                                | Tertile 3 (median:76)                    |
| BMI, kg/m <sup>2</sup>                                      | ≥30                          | 25–29.9                                                              | <25                                      |
| Total cholesterol, mg/dL                                    | ≥240                         | 200 – 239 or <200 with medication                                    | <200 without medication                  |
| BP, mmHg                                                    | SBP ≥140 or DBP ≥90          | SBP 120–139 or DBP 80–89 or<br>SBP < 120 and DBP <80 with medication | SBP <120 and DBP < 80 without medication |
| Fasting serum glucose, mg/dL ‡                              | ≥126<br>(NA by study design) | 100–125                                                              | <100 mg/dL without medication            |

Abbreviations: APDQS, A Priori Diet Quality Score; BMI, body mass index; BP, blood pressure; DBP, diastolic blood pressure; SBP, systolic blood pressure; NA, not available.

\* A total physical activity score (expressed as exercise units or EU) was calculated by summing the weighted products of all activities (frequency in months×intensity of activity). For reference, 300 EU generally corresponds to the American College of Sports Medicine's guidelines for the quantity of exercise required to promote weight loss (5 sessions of 1260 kJ [300 kcal] of weekly energy expenditure). A substudy in the Oakland clinic at Y25 showed that 300 EU corresponds to 150 minutes/week of moderate or vigorous physical activity.<sup>20</sup>

† Diet quality was assessed using the APDQS. Total score of the ADOQS summed the 46 components (possible scores 0–132, with a range of 35–95 in these data), with higher scores representing a nutritionally rich, plant-centered diet. A one-point increment represents a one-category shift in the presumed favorable direction. Beneficially-rated food group includes fruit, avocado, beans/legumes, green vegetables, yellow vegetables, tomatoes, other vegetables, nuts and seeds, soy products, whole grains, vegetable oil, fatty fish, lean fish, poultry, alcohol (beer, wine, and liquor), coffee, tea, and low-fat milk/cheese/yogurt. In practice, the amount of alcohol consumed was rarely more than a moderate level. Adversely-rated food group includes fried potatoes, grain dessert, salty snacks, pastries, sweets, high-fat red meats, processed meats, organ meats, fried fish/poultry, sauces, soft drinks, whole-fat milk/cheese/yogurt, and butter. Neutrally-rated food group includes potatoes, refined grains, margarine, chocolate, meal replacements, pickled foods, sugar substitutes, lean meats, shellfish, eggs, soups, diet drinks, and fruit juices.

‡ Original LS7 glucose component includes fasting glucose < 100 with medication within the intermediate category. For the present analysis, individuals who were taking diabetic medications at Year 0 were excluded.

**Table S2. APDQS food groups and its constituent subgroups**

|                               |                                                           |                                                      |
|-------------------------------|-----------------------------------------------------------|------------------------------------------------------|
| <b>1. Fruit</b>               | Vegetable-based savory snack                              | Loaf-type bread and plain rolls - whole grain        |
| Citrus fruit                  | <b>8. Nuts and seeds</b>                                  | Crackers - whole grain                               |
| Fruit excluding citrus fruit  | Nuts and seeds                                            | Pasta - whole grain                                  |
| Fried fruits                  | Nut and seed butters                                      | Ready-to-eat cereal (not presweetened) - whole grain |
| Fruit-based savory snack      | <b>9. Soy products</b>                                    | Ready-to-eat cereal (presweetened) - whole grain     |
| <b>2. Avocado</b>             | Meat alternatives                                         | Popcorn                                              |
| Avocado/guacamole and similar | Milk – nondairy                                           | Flavored popcorn                                     |
| <b>3. Beans/Legumes</b>       | Cheese – nondairy                                         | Snack bars - some whole grain                        |
| Legumes (cooked dried beans)  | Yogurt – nondairy                                         | Snack bars - whole grain                             |
| <b>4. Green vegetables</b>    | Frozen nondairy dessert                                   | <b>11. Vegetable oil</b>                             |
| Dark-green vegetables         | Cream – nondairy                                          | Oil                                                  |
| <b>5. Yellow vegetables</b>   | <b>10. Whole grains</b>                                   | Fried vegetables                                     |
| Deep-yellow vegetables        | Grains, flour and dry mixes - some whole grain            | <b>12. Fish</b>                                      |
| <b>6. Tomatoes</b>            | Loaf-type bread and plain rolls - some whole grain        | Fish - fresh and smoked                              |
| Tomato                        | Crackers - some whole grain                               | <b>13. Lean fish</b>                                 |
| <b>7. Other vegetables</b>    | Pasta - some whole grain                                  | Lean fish - fresh and smoked                         |
| Other starchy vegetables      | Ready-to-eat cereal (not presweetened) - some whole grain | <b>14. Poultry</b>                                   |
| Other vegetables              | Ready-to-eat cereal (presweetened) - whole grain          | Poultry                                              |
| Fried vegetables              | Grains, flour and dry mixes - whole grain                 | Lean poultry                                         |

|                                           |                                                                            |                                                        |
|-------------------------------------------|----------------------------------------------------------------------------|--------------------------------------------------------|
| <b>15. Moderate amounts of beer</b>       | Artificially sweetened tea                                                 | Cheese - reduced fat                                   |
| Beer and ales                             | Unsweetened tea                                                            | Cheese - low fat and fat free                          |
| <b>16. Moderate amounts of wine</b>       | Nondairy-based artificially sweetened meal replacement/supplement          | <b>21. Potatoes</b>                                    |
| Wine                                      | <b>20. Low-fat milk/Cheese/Yogurt</b>                                      | White potatoes                                         |
| <b>17. Moderate amounts of liquor</b>     | Yogurt - sweetened low fat                                                 | <b>22. Refined grains</b>                              |
| Cordial and liqueur                       | Yogurt - sweetened fat free                                                | Ready-to-eat cereal (not presweetened) - refined grain |
| Distilled liquor                          | Yogurt - artificially sweetened low fat                                    | Ready-to-eat cereal (presweetened) - refined grain     |
| <b>18. Coffee</b>                         | Yogurt - artificially sweetened fat free                                   | Crackers - refined grain                               |
| Sweetened coffee                          | Milk - reduced fat                                                         | Pasta - refined grain                                  |
| Artificially sweetened coffee             | Milk - low fat and fat free                                                | Grains, flour and dry mixes - refined grain            |
| Unsweetened coffee                        | Ready-to-drink flavored milk - reduced fat                                 | Loaf-type bread and plain rolls - refined grain        |
| Sweetened coffee substitutes              | Ready-to-drink flavored milk - low fat and fat free                        | Snack bars - refined grain                             |
| Artificially sweetened coffee substitutes | Sweetened flavored milk beverage powder with non-fat dry milk              | <b>23. Margarine</b>                                   |
| Unsweetened coffee substitutes            | Artificially sweetened flavored milk beverage powder with non-fat dry milk | Margarine - regular                                    |
| <b>19. Tea</b>                            | Cream - reduced fat                                                        | Margarine - reduced fat                                |
| Sweetened tea                             | Cream - low fat and fat free                                               | <b>24. Chocolate</b>                                   |

|                                                                   |                                                                              |                                                                                   |
|-------------------------------------------------------------------|------------------------------------------------------------------------------|-----------------------------------------------------------------------------------|
| Chocolate candy                                                   | Shellfish                                                                    | Cakes, cookies, pies, pastries, danish, doughnuts and cobblers - some whole grain |
| <b>25. Meal replacements</b>                                      | <b>30. Eggs</b>                                                              | Cakes, cookies, pies, pastries, danish, doughnuts and cobblers - refined grain    |
| Dairy-based sweetened meal replacement/supplement                 | Eggs                                                                         | Miscellaneous dessert                                                             |
| Dairy-based artificially sweetened meal replacement/supplement    | Egg substitute                                                               | <b>36. Salty snacks</b>                                                           |
| Nondairy-based sweetened meal replacement/supplement              | <b>31. Soups</b>                                                             | Snack chips - whole grain                                                         |
| Nondairy-based artificially sweetened meal replacement/supplement | Soup broth                                                                   | Snack chips - some whole grain                                                    |
| Nondairy-based unsweetened meal replacement/supplement            | <b>32. Diet drinks</b>                                                       | Snack chips - refined grain                                                       |
| <b>26. Pickled foods</b>                                          | Artificially sweetened soft drinks                                           | <b>37. Pastries</b>                                                               |
| Pickled foods                                                     | Unsweetened soft drinks                                                      | Other breads (quick breads, corn muffins, tortillas) - whole grain                |
| <b>27. Sugar substitutes</b>                                      | Artificially sweetened water                                                 | Other breads (quick breads, corn muffins, tortillas) - some whole grain           |
| Sugar substitute                                                  | Artificially sweetened fruit drinks                                          | Other breads (quick breads, corn muffins, tortillas) - refined grain              |
| <b>28. Lean meats</b>                                             | <b>33. Fruit juices</b>                                                      | <b>38. Sweets</b>                                                                 |
| Beef                                                              | Citrus juice                                                                 | Sugar                                                                             |
| Veal                                                              | Fruit juice excluding citrus juice                                           | Syrup, honey, jam, jelly, preserves                                               |
| Lamb                                                              | <b>34. Fried potatoes</b>                                                    | Non-chocolate candy                                                               |
| Cured pork                                                        | Fried potatoes                                                               | Frosting or glaze                                                                 |
| Fresh pork                                                        | <b>35. Grain dessert</b>                                                     | <b>39. High-fat meats</b>                                                         |
| <b>29. Shellfish</b>                                              | Cakes, cookies, pies, pastries, danish, doughnuts and cobblers - whole grain | Lean fresh pork                                                                   |

|                                                       |                                                        |                                                                               |
|-------------------------------------------------------|--------------------------------------------------------|-------------------------------------------------------------------------------|
| Lean lamb                                             | Sauces, sweet – regular                                | Ready-to-drink flavored milk – whole                                          |
| Lean cured pork                                       | Sauces, sweet - reduced fat/reduced calorie/fat free   | Sweetened flavored milk beverage powder without non-fat dry milk              |
| Game                                                  | Sauces and condiments - regular                        | Artificially sweetened flavored milk beverage powder without non-fat dry milk |
| Lean veal                                             | Sauces and condiments - reduced fat                    | Cheese - full fat                                                             |
| Lean beef                                             | <b>44. Soft drink</b>                                  | <b>46. Butter</b>                                                             |
| <b>40. Processed meats</b>                            | Sweetened soft drinks                                  | Butter and other animal fats – regular                                        |
| Cold cuts and sausage                                 | Sweetened water                                        | Butter and other animal fats - reduced fat                                    |
| Lean cold cuts and sausage                            | Sweetened fruit drinks                                 | Shortening                                                                    |
| Meat-based savory snack                               | Non-alcoholic beer                                     |                                                                               |
| <b>41. Organ meats</b>                                | Non-alcoholic light beer                               |                                                                               |
| Organ meats                                           | <b>45. Whole-fat milk/Cheese/Yogurt</b>                |                                                                               |
| <b>42. Fried fish/Poultry</b>                         | Yogurt - sweetened whole milk                          |                                                                               |
| Fried chicken - commercial entrée and fast food       | Yogurt - artificially sweetened whole milk             |                                                                               |
| Fried fish - commercial entrée and fast food          | Frozen dairy dessert                                   |                                                                               |
| Fried shellfish - commercial entrée and fast food     | Pudding and other dairy dessert                        |                                                                               |
| <b>43. Sauces</b>                                     | Artificially sweetened pudding and other dairy dessert |                                                                               |
| Salad dressing – regular                              | Cream                                                  |                                                                               |
| Salad dressing - reduced fat/reduced calorie/fat free | Milk – whole                                           |                                                                               |

Table was taken from Supplemental Table 4 of Choi Y., et al. *Diabetes Care*. 2020;43:2796–2803.<sup>23</sup>

Abbreviations: APDQS, A Priori Diet Quality Score. The food groups were derived from NDSR. The following 9/166 food groups were not included in the CARDIA APDQS: Baby food dessert, Baby food grain mixtures, Baby food meat mixtures, infant formula, infant formula – nondairy, miscellaneous baby food mixtures, non-grain flour and similar, unsweetened water, and snack bars – refined grain.

**Table S3. Quintile cutpoints\* of 46 individual food groups for total score computation of the APDQS**

|                                | Cutpoints (servings/day)      |                               |                               |                               |
|--------------------------------|-------------------------------|-------------------------------|-------------------------------|-------------------------------|
|                                | Cutpoint 1                    | Cutpoint 2                    | Cutpoint 3                    | Cutpoint 4                    |
|                                | (20 <sup>th</sup> percentile) | (40 <sup>th</sup> percentile) | (60 <sup>th</sup> percentile) | (80 <sup>th</sup> percentile) |
| <b>Beneficially-rated</b>      |                               |                               |                               |                               |
| 1. Fruit                       | 0.3                           | 0.71                          | 1.23                          | 2.18                          |
| 2. Avocado                     | 0                             | 0.06                          | 0.15                          | 0.39                          |
| 3. Beans and legumes           | 0                             | 0.06                          | 0.14                          | 0.31                          |
| 4. Green vegetables            | 0.01                          | 0.1                           | 0.23                          | 0.53                          |
| 5. Yellow vegetables           | 0                             | 0.04                          | 0.13                          | 0.32                          |
| 6. Tomato                      | 0.14                          | 0.26                          | 0.42                          | 0.71                          |
| 7. Other vegetables            | 0.84                          | 1.35                          | 1.96                          | 2.98                          |
| 8. Nuts and seeds              | 0                             | 0.14                          | 0.46                          | 1.1                           |
| 9. Soy products                | 0                             | 0.05                          | 0.2                           | 0.76                          |
| 10. Whole grains               | 0.27                          | 0.76                          | 1.41                          | 2.43                          |
| 11. Vegetable oil              | 0.27                          | 0.65                          | 1.2                           | 2.25                          |
| 12. Fatty fish                 | 0                             | 0.1                           | 0.15                          | 0.29                          |
| 13. Lean fish                  | 0.02                          | 0.22                          | 0.49                          | 1.05                          |
| 14. Poultry                    | 0.33                          | 0.61                          | 1.01                          | 1.82                          |
| 15. Beer                       | 0                             | 0.15                          | 0.45                          | 1.1                           |
| 16. Wine                       | 0                             | 0.08                          | 0.16                          | 0.38                          |
| 17. Liquor                     | 0                             | 0.08                          | 0.2                           | 0.45                          |
| 18. Coffee                     | 0                             | 0.36                          | 1.16                          | 2.59                          |
| 19. Tea                        | 0                             | 0.14                          | 0.42                          | 1.09                          |
| 20. Low-fat milk/Cheese/Yogurt | 0.12                          | 0.32                          | 0.78                          | 1.87                          |
| <b>Neutrally-rated</b>         |                               |                               |                               |                               |
| 1. Potatoes                    | 0.07                          | 0.17                          | 0.32                          | 0.62                          |
| 2. Refined grains              | 1.9                           | 3.03                          | 4.42                          | 6.52                          |
| 3. Margarine                   | 0.02                          | 0.46                          | 1.32                          | 2.9                           |
| 4. Chocolate                   | 0                             | 0.07                          | 0.16                          | 0.36                          |

|                                  |      |      |      |      |
|----------------------------------|------|------|------|------|
| 5. Meal replacements             | 0    | 0.1  | 0.26 | 0.56 |
| 6. Pickled foods                 | 0    | 0.07 | 0.19 | 0.42 |
| 7. Sugar substitutes             | 0    | 0.1  | 0.26 | 0.71 |
| 8. Lean red meats                | 0.02 | 0.29 | 0.61 | 1.24 |
| 9. Shellfish                     | 0    | 0.06 | 0.16 | 0.38 |
| 10. Eggs                         | 0    | 0.22 | 0.48 | 0.93 |
| 11. Soups                        | 0    | 0.01 | 0.04 | 0.09 |
| 12. Diet soft drinks             | 0    | 0.28 | 0.83 | 1.62 |
| 13. Fruit juice                  | 0.36 | 0.87 | 1.64 | 2.91 |
| <b>Adversely-rated</b>           |      |      |      |      |
| 1. Fried potatoes                | 0    | 0.12 | 0.25 | 0.52 |
| 2. Grain desserts                | 0.11 | 0.29 | 0.55 | 1.05 |
| 3. Salty snacks                  | 0    | 0.03 | 0.08 | 0.17 |
| 4. Pastries                      | 0.2  | 0.46 | 0.83 | 1.49 |
| 5. Sweets                        | 0.24 | 0.65 | 1.38 | 2.73 |
| 6. High-fat red meats            | 0.69 | 1.32 | 2.12 | 3.48 |
| 7. Processed meats               | 0.1  | 0.33 | 0.69 | 1.38 |
| 8. Organ meats                   | 0    | 0.1  | 0.18 | 0.35 |
| 9. Fried poultry and fish        | 0    | 0.02 | 0.08 | 1.15 |
| 10. Sauces                       | 1.41 | 2.41 | 3.81 | 6.35 |
| 11. Soft drinks                  | 0.12 | 0.57 | 1.3  | 2.45 |
| 12. Whole-fat milk/Cheese/Yogurt | 0.62 | 1.08 | 1.71 | 2.95 |
| 13. Butter                       | 1.47 | 2.64 | 4.23 | 7.03 |

---

Table was taken from Supplemental Table 1 of Choi Y., et al. *J Am Heart Assoc.* 2021;10:e020718.<sup>24</sup>

Abbreviations: APDQS, A Priori Diet Quality Score.

\*The cutoffs of food group derived from the Year 0 diet data.
